# Supplementary material
Source: ML conference proceedings conference paper supplement (https://openaccess.thecvf.com/content/ICCV2025/html/Zhu_Addressing_Representation_Collapse_ICCV_2025_paper.html)
Supplement: Supplementary file 1 [file Zhu_Addressing_Representation_Collapse_ICCV_2025_supplemental.pdf]

# Addressing Representation Collapse in Vector Quantized Models with One Linear Layer

## Supplementary Material

### 8. Appendix

#### 8.1. Experimental Configurations

Tab. 5 provides the experimental configurations for both image and audio modalities utilized in this study. For the image modality, the input size is specified as  $128 \times 128 \times 3$ . The batch size for images is set at 256. The model is trained for a total of 50 epochs. Each image is represented with a quantized sequence length of  $16 \times 16$ , dividing the input data into a grid of tokens. In terms of optimization, the AdamW optimizer is employed with a constant learning rate of  $1e - 4$ , and no warmup epochs are implemented. The commitment coefficient for images is set to 1.0. The adversarial coefficient for this modality is established at 0.1, affecting the training dynamics in the context of adversarial methodologies. Regarding data augmentation, a random horizontal flip is applied to the image inputs, enhancing the robustness of the model.

The audio input size is defined as  $24,000 \times 1$ , reflecting a one-dimensional audio signal sampled at a rate of 24,000 Hz (1 second). The batch size for audio data is set at 64. The model undergoes a training duration of 50 epochs. The optimization settings remain consistent, utilizing the AdamW optimizer and a constant learning rate of  $1e - 4$  with no warmup epochs. The commitment coefficient for audio is set to 1000.0 and the adversarial coefficient is set at 1.0, which is the same as WavTokenizer.

| Config                    | Image                     | Audio             |
|---------------------------|---------------------------|-------------------|
| inputs                    | pixels                    | window size       |
| input size                | $128 \times 128 \times 3$ | $24,000 \times 1$ |
| batch size                | 256                       | 64                |
| training epochs           | 50                        | 50                |
| quantized sequence length | $16 \times 16$            | 75                |
| <b>optimization</b>       |                           |                   |
| optimizer                 | AdamW                     | AdamW             |
| learning rate             | $1e-4$                    | $1e-4$            |
| learning rate schedule    | constant                  | constant          |
| warmup epochs             | 0                         | 0                 |
| commitment coefficient    | 1.0                       | 1000.0            |
| adversarial coefficient   | 0.1                       | 1.0               |
| <b>data augmentations</b> |                           |                   |
| random horizontal flip    | true                      | false             |

Table 5. Experimental configurations on image and audio.

#### 8.2. Loss Curve

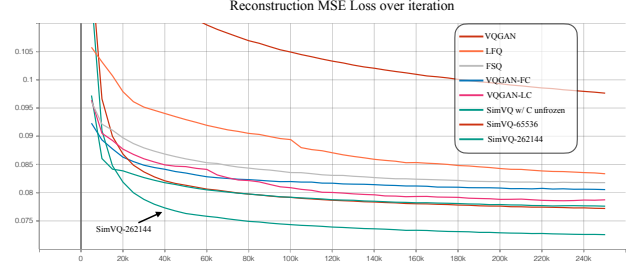

Figure 6. The loss curve over epochs of different models on the validation dataset.

#### 8.3. Codebook Distribution

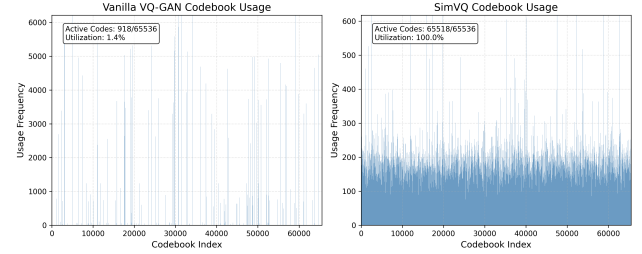

Figure 7. The frequency of codebook on ImageNet validation set.

#### 8.4. Qualitative Cases

We provide image and audio cases of SimVQ with various codebook sizes below.

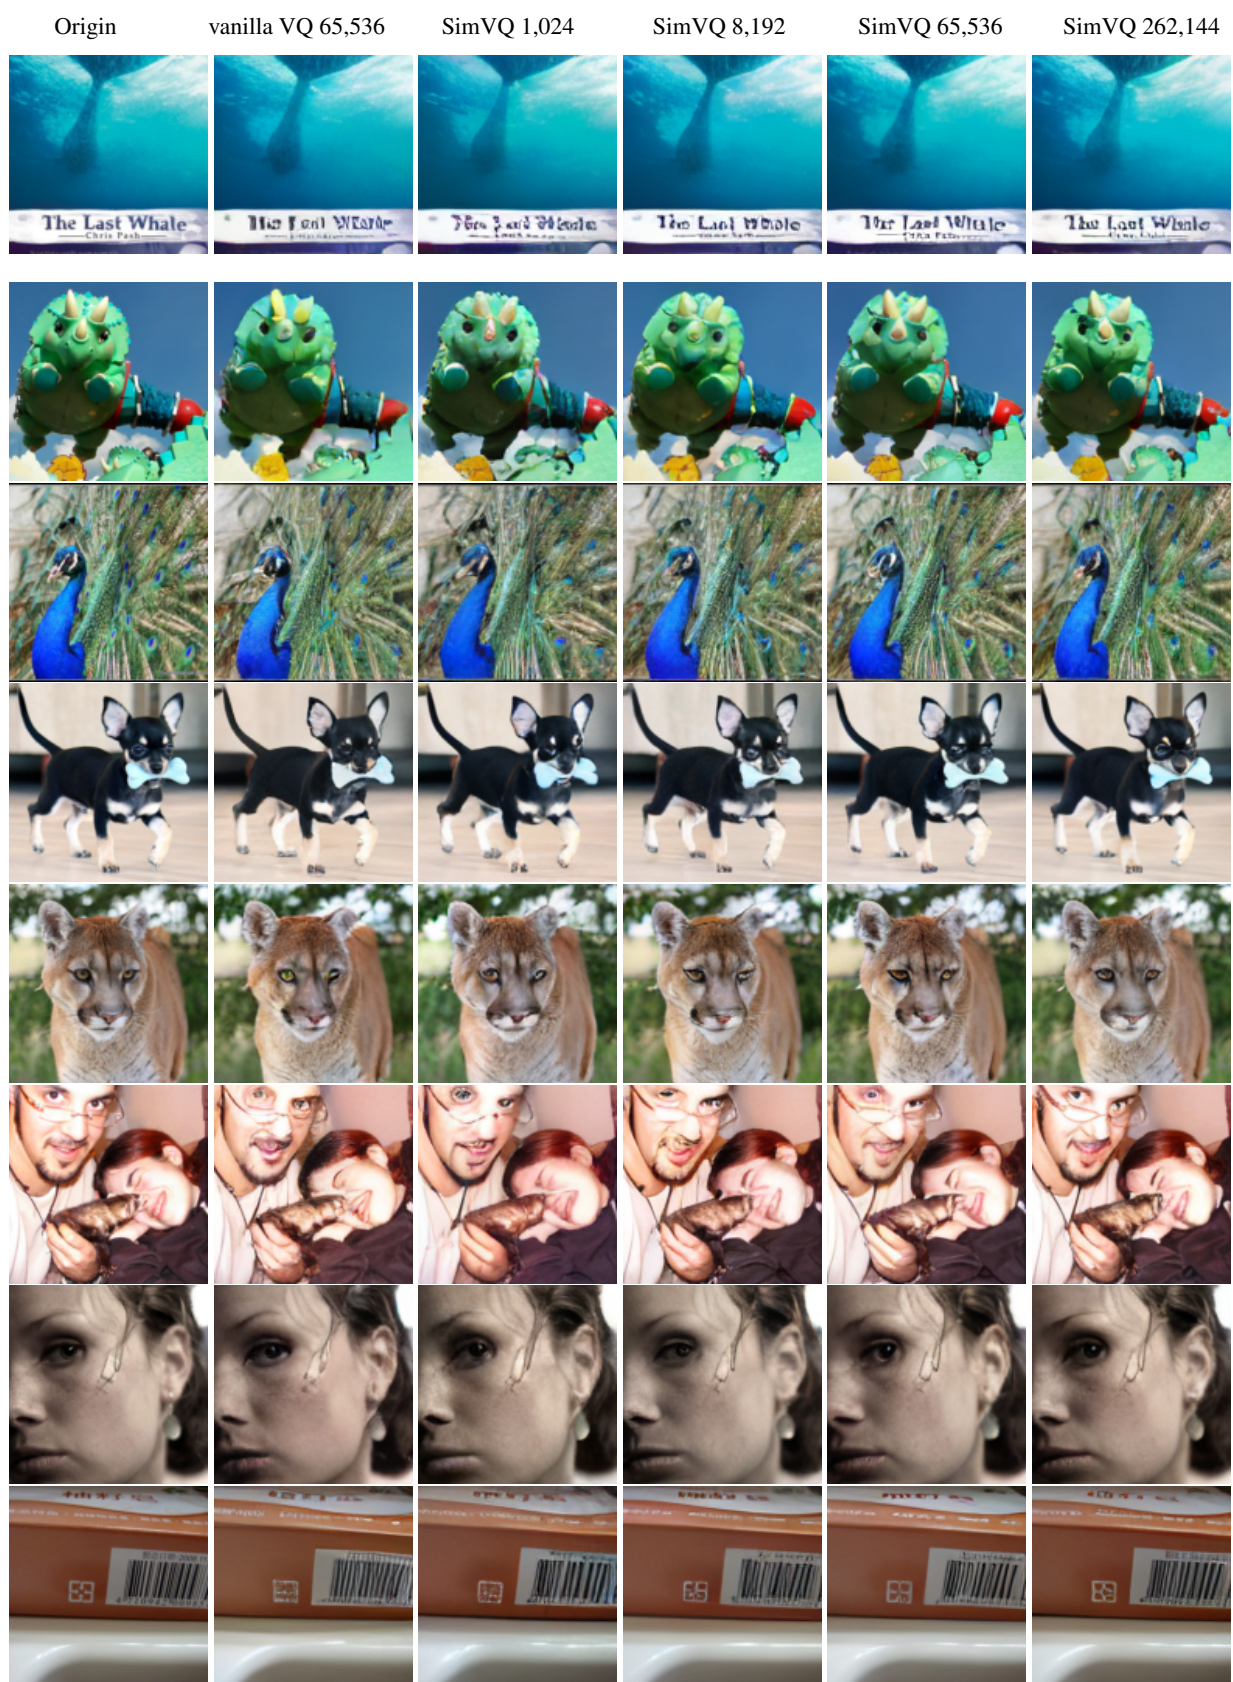

Figure 8. Image reconstruction samples with different codebook sizes.

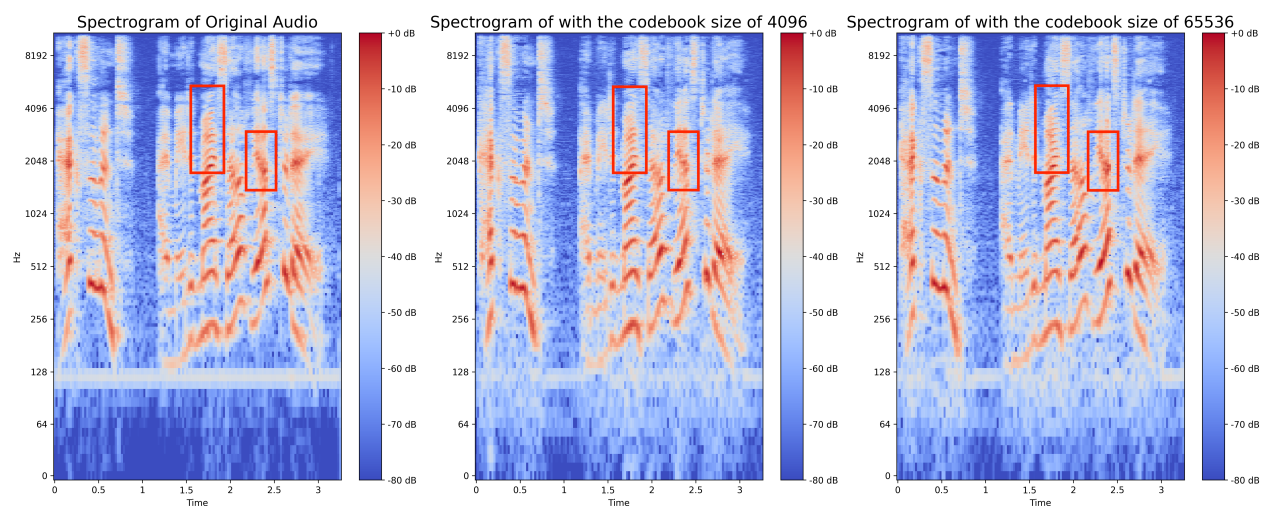

Figure 9. The spectrogram of audio reconstruction samples with different codebook sizes.

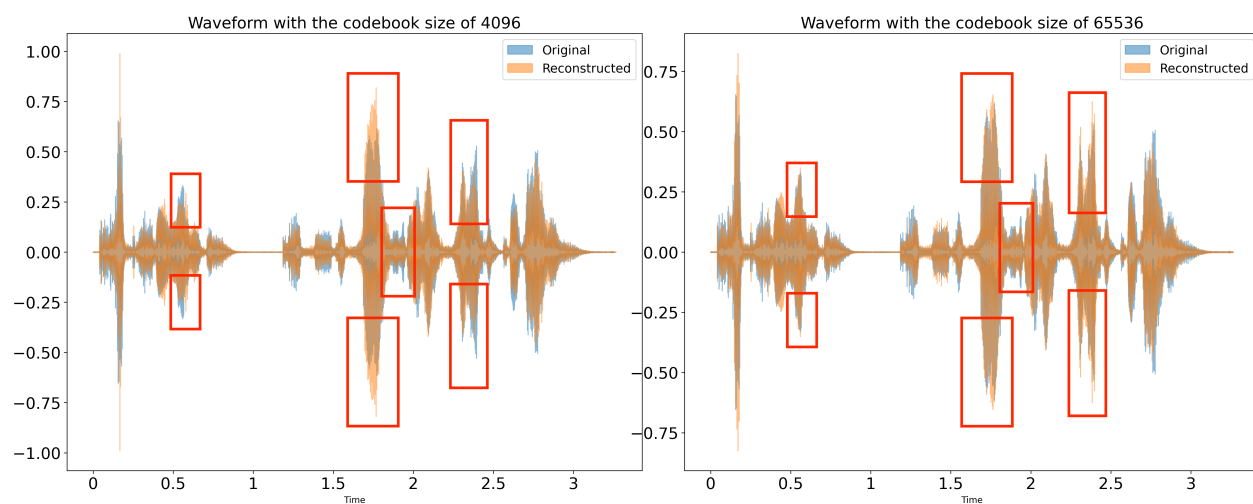

Figure 10. The waveform of audio reconstruction samples with different codebook sizes.
